# Supplementary material for: Screening of Entomopathogenic Fungal Culture Extracts with Honeybee Nosemosis Inhibitory Activity
Source: MDPI journal article supplement (doi:10.3390/insects14060538), 2023-06-09
Supplement: s1 [file s1]

**Table S1.** Entomopathogenic fungal isolates used in the experiment.

| No. of isolate | Identification                      | No. of isolate | Identification                | No. of isolate | Identification                      | No. of isolate | Identification                |
|----------------|-------------------------------------|----------------|-------------------------------|----------------|-------------------------------------|----------------|-------------------------------|
| 1              | <i>Simplicillium aogashimaense</i>  | 112            | <i>Metarhizium anisopliae</i> | 223            | <i>Cordyceps farinosa</i>           | 327            | <i>Beauveria bassiana</i>     |
| 2              | <i>Beauveria bassiana</i>           | 113            | <i>Beauveria bassiana</i>     | 224            | <i>Cordyceps fumosorosea</i>        | 328            | <i>Beauveria bassiana</i>     |
| 3              | <i>Beauveria brongniartii</i>       | 114            | <i>Beauveria bassiana</i>     | 225            | <i>Metarhizium lepidiotae</i>       | 329            | <i>Metarhizium anisopliae</i> |
| 4              | <i>Tolypocladium album</i>          | 115            | <i>Cordyceps farinosa</i>     | 226            | <i>Pochonia bulbillosa</i>          | 330            | <i>Metarhizium anisopliae</i> |
| 5              | <i>Beauveria bassiana</i>           | 117            | <i>Pochonia bulbillosa</i>    | 227            | <i>Paraconiothyrium sporulosum</i>  | 331            | <i>Beauveria bassiana</i>     |
| 6              | <i>Bionectria ochroleuca</i>        | 119            | <i>Tolypocladium album</i>    | 228            | <i>Metarhizium pemphigus</i>        | 332            | <i>Beauveria bassiana</i>     |
| 7              | <i>Beauveria bassiana</i>           | 120            | <i>Metarhizium anisopliae</i> | 229            | <i>Beauveria bassiana</i>           | 333            | <i>Metarhizium pemphigus</i>  |
| 8              | <i>Tolypocladium album</i>          | 121            | <i>Cordyceps farinosa</i>     | 230            | <i>Beauveria bassiana</i>           | 334            | <i>Beauveria bassiana</i>     |
| 9              | <i>Beauveria bassiana</i>           | 123            | <i>Tolypocladium album</i>    | 231            | <i>Metarhizium anisopliae</i>       | 335            | <i>Beauveria bassiana</i>     |
| 10             | <i>Beauveria bassiana</i>           | 124            | <i>Metarhizium anisopliae</i> | 232            | <i>Cordyceps javanica</i>           | 336            | <i>Beauveria bassiana</i>     |
| 12             | <i>Beauveria brongniartii</i>       | 125            | <i>Metarhizium anisopliae</i> | 233            | <i>Cordyceps javanica</i>           | 337            | <i>Beauveria bassiana</i>     |
| 13             | <i>Beauveria brongniartii</i>       | 126            | <i>Metarhizium anisopliae</i> | 234            | <i>Beauveria cf. bassiana</i>       | 338            | <i>Beauveria bassiana</i>     |
| 14             | <i>Pochonia rubescens</i>           | 127            | <i>Paecilomyces lilacinus</i> | 235            | <i>Cordyceps javanica</i>           | 339            | <i>Aspergillus versicolor</i> |
| 15             | <i>Tolypocladium cylindrosporum</i> | 128            | <i>Metarhizium anisopliae</i> | 236            | <i>Bionectria ochroleuca</i>        | 340            | <i>Beauveria bassiana</i>     |
| 16             | <i>Beauveria bassiana</i>           | 129            | <i>Metarhizium anisopliae</i> | 237            | <i>Tolypocladium cylindrosporum</i> | 341            | <i>Beauveria bassiana</i>     |
| 17             | <i>Beauveria bassiana</i>           | 130            | <i>Beauveria bassiana</i>     | 238            | <i>Metarhizium pemphigus</i>        | 342            | <i>Metarhizium anisopliae</i> |
| 18             | <i>Cordyceps javanica</i>           | 131            | <i>Paecilomyces lilacinus</i> | 239            | <i>Beauveria bassiana</i>           | 343            | <i>Cordyceps javanica</i>     |
| 19             | <i>Beauveria bassiana</i>           | 132            | <i>Cordyceps javanica</i>     | 240            | <i>Beauveria bassiana</i>           | 344            | <i>Paecilomyces lilacinus</i> |
| 20             | <i>Beauveria bassiana</i>           | 133            | <i>Beauveria bassiana</i>     | 241            | <i>Bionectria ochroleuca</i>        | 345            | <i>Aspergillus versicolor</i> |
| 22             | <i>Tolypocladium album</i>          | 134            | <i>Metarhizium anisopliae</i> | 242            | <i>Lecanicillium sp.</i>            | 346            | <i>Beauveria bassiana</i>     |
| 23             | <i>Beauveria bassiana</i>           | 135            | <i>Beauveria bassiana</i>     | 243            | <i>Beauveria bassiana</i>           | 347            | <i>Paecilomyces lilacinus</i> |
| 24             | <i>Paraconiothyrium sporulosum</i>  | 136            | <i>Cordyceps javanica</i>     | 244            | <i>Pochonia bulbillosa</i>          | 348            | <i>Beauveria bassiana</i>     |
| 25             | <i>Beauveria bassiana</i>           | 137            | <i>Metarhizium anisopliae</i> | 245            | <i>Tolypocladium album</i>          | 349            | <i>Metarhizium anisopliae</i> |
| 26             | <i>Beauveria bassiana</i>           | 138            | <i>Metarhizium pemphigus</i>  | 246            | <i>Metarhizium anisopliae</i>       | 350            | <i>Bionectria ochroleuca</i>  |
| 27             | <i>Beauveria bassiana</i>           | 139            | <i>Metarhizium anisopliae</i> | 247            | <i>Beauveria bassiana</i>           | 351            | <i>Beauveria bassiana</i>     |
| 28             | <i>Paecilomyces lilacinus</i>       | 140            | <i>Beauveria brongniartii</i> | 249            | <i>Beauveria bassiana</i>           | 352            | <i>Clonostachys rosea</i>     |
| 29             | <i>Beauveria bassiana</i>           | 142            | <i>Myrothecium sp.</i>        | 250            | <i>Tolypocladium cylindrosporum</i> | 353            | <i>Beauveria bassiana</i>     |
| 30             | <i>Cordyceps javanica</i>           | 143            | <i>Aspergillus lentulus</i>   | 251            | <i>Metarhizium anisopliae</i>       | 354            | <i>Beauveria bassiana</i>     |
| 31             | <i>Fusarium oxysporum</i>           | 144            | <i>Metarhizium anisopliae</i> | 252            | <i>Beauveria bassiana</i>           | 355            | <i>Mucoromycotina sp.</i>     |
| 32             | <i>Pochonia bulbillosa</i>          | 145            | <i>Beauveria bassiana</i>     | 253            | <i>Beauveria bassiana</i>           | 356            | <i>Paecilomyces lilacinus</i> |
| 33             | <i>Pochonia bulbillosa</i>          | 146            | <i>Beauveria bassiana</i>     | 254            | <i>Beauveria brongniartii</i>       | 357            | <i>Pochonia bulbillosa</i>    |
| 34             | <i>Pochonia bulbillosa</i>          | 148            | <i>Cordyceps farinosa</i>     | 255            | <i>Beauveria bassiana</i>           | 358            | <i>Beauveria bassiana</i>     |

|    |                                |     |                                      |     |                                 |     |                                |
|----|--------------------------------|-----|--------------------------------------|-----|---------------------------------|-----|--------------------------------|
| 35 | <i>Beauveria bassiana</i>      | 149 | <i>Beauveria bassiana</i>            | 257 | <i>Metarhizium anisopliae</i>   | 359 | <i>Beauveria brongniartii</i>  |
| 37 | <i>Pochonia bulbillosa</i>     | 150 | <i>Metarhizium anisopliae</i>        | 258 | <i>Cordyceps farinosa</i>       | 360 | <i>Metarhizium anisopliae</i>  |
| 38 | <i>Paecilomyces marquandii</i> | 151 | <i>Metarhizium anisopliae</i>        | 259 | <i>Metarhizium pemphigus</i>    | 361 | <i>Cordyceps fumosorosea</i>   |
| 39 | <i>Beauveria bassiana</i>      | 152 | <i>Aspergillus lentulus</i>          | 261 | <i>Beauveria bassiana</i>       | 362 | <i>Aspergillus versicolor</i>  |
| 40 | <i>Cordyceps fumosorosea</i>   | 153 | <i>Metarhizium anisopliae</i>        | 262 | <i>Acremonium strictum</i>      | 363 | <i>Metarhizium anisopliae</i>  |
| 41 | <i>Beauveria bassiana</i>      | 154 | <i>Phialocephala</i> sp.             | 263 | <i>Cordyceps farinosa</i>       | 364 | <i>Paecilomyces marquandii</i> |
| 42 | <i>Beauveria bassiana</i>      | 155 | <i>Metarhizium pemphigus</i>         | 264 | <i>Beauveria bassiana</i>       | 365 | <i>Metarhizium anisopliae</i>  |
| 43 | <i>Cordyceps javanica</i>      | 156 | <i>Metarhizium pemphigus</i>         | 265 | <i>Beauveria bassiana</i>       | 366 | <i>Beauveria bassiana</i>      |
| 45 | <i>Bionectria ochroleuca</i>   | 157 | <i>Metarhizium pemphigus</i>         | 266 | <i>Metarhizium anisopliae</i>   | 367 | <i>Metarhizium anisopliae</i>  |
| 46 | <i>Aspergillus lentulus</i>    | 158 | <i>Tolypocladium album</i>           | 267 | <i>Verticillium insectorum</i>  | 368 | <i>Metarhizium anisopliae</i>  |
| 47 | <i>Cordyceps javanica</i>      | 159 | <i>Metarhizium anisopliae</i>        | 268 | <i>Metarhizium anisopliae</i>   |     |                                |
| 48 | <i>Beauveria bassiana</i>      | 160 | <i>Metarhizium anisopliae</i>        | 269 | <i>Metarhizium pemphigus</i>    |     |                                |
| 49 | <i>Beauveria bassiana</i>      | 161 | <i>Beauveria bassiana</i>            | 270 | <i>Beauveria bassiana</i>       |     |                                |
| 50 | <i>Tolypocladium album</i>     | 162 | <i>Cordyceps javanica</i>            | 271 | <i>Metarhizium anisopliae</i>   |     |                                |
| 51 | <i>Beauveria bassiana</i>      | 163 | <i>Beauveria</i> cf. <i>bassiana</i> | 272 | <i>Cordyceps farinosa</i>       |     |                                |
| 52 | <i>Beauveria bassiana</i>      | 164 | <i>Beauveria bassiana</i>            | 273 | <i>Simplicillium</i> sp.        |     |                                |
| 53 | <i>Tolypocladium album</i>     | 165 | <i>Cordyceps javanica</i>            | 274 | <i>Metarhizium anisopliae</i>   |     |                                |
| 54 | <i>Tolypocladium album</i>     | 167 | <i>Lecanicillium</i> sp.             | 275 | <i>Beauveria bassiana</i>       |     |                                |
| 56 | <i>Cordyceps javanica</i>      | 168 | <i>Beauveria bassiana</i>            | 276 | <i>Metarhizium anisopliae</i>   |     |                                |
| 57 | <i>Cordyceps javanica</i>      | 169 | <i>Beauveria bassiana</i>            | 277 | <i>Tolypocladium album</i>      |     |                                |
| 58 | <i>Beauveria bassiana</i>      | 170 | <i>Tolypocladium album</i>           | 278 | <i>Metarhizium anisopliae</i>   |     |                                |
| 59 | <i>Beauveria bassiana</i>      | 171 | <i>Paecilomyces marquandii</i>       | 279 | <i>Metarhizium anisopliae</i>   |     |                                |
| 60 | <i>Pochonia bulbillosa</i>     | 172 | <i>Myrothecium</i> sp.               | 280 | <i>Pochonia bulbillosa</i>      |     |                                |
| 61 | <i>Beauveria bassiana</i>      | 173 | <i>Pochonia bulbillosa</i>           | 281 | <i>Metarhizium anisopliae</i>   |     |                                |
| 62 | <i>Beauveria bassiana</i>      | 174 | <i>Beauveria bassiana</i>            | 282 | <i>Beauveria bassiana</i>       |     |                                |
| 63 | <i>Pochonia bulbillosa</i>     | 175 | <i>Metarhizium anisopliae</i>        | 283 | <i>Tolypocladium album</i>      |     |                                |
| 64 | <i>Beauveria bassiana</i>      | 177 | <i>Metarhizium anisopliae</i>        | 284 | <i>Metarhizium anisopliae</i>   |     |                                |
| 65 | <i>Beauveria bassiana</i>      | 179 | <i>Metarhizium anisopliae</i>        | 285 | <i>Cordyceps javanica</i>       |     |                                |
| 66 | <i>Beauveria bassiana</i>      | 180 | <i>Metarhizium pemphigus</i>         | 286 | <i>Lecanicillium</i> sp.        |     |                                |
| 67 | <i>Tolypocladium album</i>     | 181 | <i>Cordyceps farinosa</i>            | 287 | <i>Metarhizium anisopliae</i>   |     |                                |
| 68 | <i>Tolypocladium album</i>     | 182 | <i>Metarhizium anisopliae</i>        | 288 | <i>Beauveria pseudobassiana</i> |     |                                |
| 69 | <i>Beauveria bassiana</i>      | 183 | <i>Beauveria brongniartii</i>        | 289 | <i>Beauveria bassiana</i>       |     |                                |
| 70 | <i>Tolypocladium album</i>     | 184 | <i>Metarhizium pemphigus</i>         | 290 | <i>Metarhizium anisopliae</i>   |     |                                |
| 71 | <i>Tolypocladium album</i>     | 185 | <i>Pochonia bulbillosa</i>           | 291 | <i>Tolypocladium album</i>      |     |                                |
| 72 | <i>Beauveria bassiana</i>      | 186 | <i>Metarhizium pemphigus</i>         | 292 | <i>Beauveria pseudobassiana</i> |     |                                |

|     |                                |     |                                |     |                                 |
|-----|--------------------------------|-----|--------------------------------|-----|---------------------------------|
| 73  | <i>Tolypocladium album</i>     | 187 | <i>Metarhizium pemphigus</i>   | 293 | <i>Beauveria bassiana</i>       |
| 74  | <i>Beauveria bassiana</i>      | 188 | <i>Beauveria bassiana</i>      | 294 | <i>Beauveria bassiana</i>       |
| 75  | <i>Fusarium oxysporum</i>      | 189 | <i>Beauveria bassiana</i>      | 295 | <i>Metarhizium anisopliae</i>   |
| 76  | <i>Cordyceps javanica</i>      | 190 | <i>Lecanicillium sp.</i>       | 296 | <i>Metarhizium anisopliae</i>   |
| 77  | <i>Beauveria bassiana</i>      | 192 | <i>Metarhizium pemphigus</i>   | 297 | <i>Metarhizium anisopliae</i>   |
| 78  | <i>Pochonia bulbillosa</i>     | 193 | <i>Beauveria bassiana</i>      | 298 | <i>Cordyceps fumosorosea</i>    |
| 79  | <i>Beauveria bassiana</i>      | 194 | <i>Metarhizium anisopliae</i>  | 299 | <i>Metarhizium anisopliae</i>   |
| 80  | <i>Beauveria bassiana</i>      | 195 | <i>Cordyceps fumosorosea</i>   | 300 | <i>Beauveria pseudobassiana</i> |
| 83  | <i>Paecilomyces lilacinus</i>  | 196 | <i>Paecilomyces marquandii</i> | 301 | <i>Pochonia bulbillosa</i>      |
| 84  | <i>Myrothecium sp.</i>         | 197 | <i>Metarhizium anisopliae</i>  | 302 | <i>Metarhizium anisopliae</i>   |
| 85  | <i>Tolypocladium album</i>     | 198 | <i>Metarhizium anisopliae</i>  | 303 | <i>Beauveria bassiana</i>       |
| 86  | <i>Paecilomyces marquandii</i> | 199 | <i>Beauveria cf. bassiana</i>  | 304 | <i>Myrothecium sp.</i>          |
| 87  | <i>Aspergillus lentulus</i>    | 201 | <i>Beauveria bassiana</i>      | 305 | <i>Beauveria bassiana</i>       |
| 88  | <i>Cordyceps javanica</i>      | 202 | <i>Metarhizium anisopliae</i>  | 306 | <i>Beauveria bassiana</i>       |
| 89  | <i>Beauveria bassiana</i>      | 203 | <i>Metarhizium anisopliae</i>  | 307 | <i>Beauveria bassiana</i>       |
| 90  | <i>Cordyceps javanica</i>      | 204 | <i>Beauveria bassiana</i>      | 308 | <i>Beauveria bassiana</i>       |
| 91  | <i>Beauveria bassiana</i>      | 205 | <i>Bionectria ochroleuca</i>   | 309 | <i>Beauveria bassiana</i>       |
| 92  | <i>Myrothecium sp.</i>         | 206 | <i>Beauveria bassiana</i>      | 310 | <i>Lecanicillium sp.</i>        |
| 93  | <i>Tolypocladium album</i>     | 207 | <i>Metarhizium anisopliae</i>  | 311 | <i>Metarhizium anisopliae</i>   |
| 95  | <i>Beauveria bassiana</i>      | 208 | <i>Beauveria bassiana</i>      | 312 | <i>Bionectria ochroleuca</i>    |
| 96  | <i>Beauveria bassiana</i>      | 209 | <i>Metarhizium anisopliae</i>  | 313 | <i>Lecanicillium sp.</i>        |
| 97  | <i>Cordyceps javanica</i>      | 210 | <i>Beauveria bassiana</i>      | 314 | <i>Beauveria pseudobassiana</i> |
| 98  | <i>Simplicillium sp.</i>       | 211 | <i>Metarhizium anisopliae</i>  | 315 | <i>Cordyceps farinosa</i>       |
| 99  | <i>Beauveria bassiana</i>      | 213 | <i>Beauveria brongniartii</i>  | 316 | <i>Beauveria pseudobassiana</i> |
| 100 | <i>Cordyceps javanica</i>      | 214 | <i>Cordyceps fumosorosea</i>   | 317 | <i>Cordyceps farinosa</i>       |
| 101 | <i>Pochonia bulbillosa</i>     | 215 | <i>Beauveria bassiana</i>      | 318 | <i>Metarhizium anisopliae</i>   |
| 102 | <i>Beauveria bassiana</i>      | 216 | <i>Metarhizium anisopliae</i>  | 320 | <i>Metarhizium anisopliae</i>   |
| 103 | <i>Metarhizium pemphigus</i>   | 217 | <i>Metarhizium anisopliae</i>  | 321 | <i>Beauveria bassiana</i>       |
| 104 | <i>Lecanicillium sp.</i>       | 218 | <i>Metarhizium anisopliae</i>  | 322 | <i>Beauveria bassiana</i>       |
| 105 | <i>Aspergillus lentulus</i>    | 219 | <i>Beauveria bassiana</i>      | 323 | <i>Metarhizium pemphigus</i>    |
| 106 | <i>Cordyceps javanica</i>      | 220 | <i>Cordyceps farinosa</i>      | 324 | <i>Tolypocladium album</i>      |
| 107 | <i>Tolypocladium album</i>     | 221 | <i>Lecanicillium sp.</i>       | 325 | <i>Beauveria bassiana</i>       |
| 110 | <i>Cordyceps javanica</i>      | 222 | <i>Metarhizium anisopliae</i>  | 326 | <i>Cordyceps farinosa</i>       |

**Table S2.** Germination inhibition activity of entomopathogenic fungal culture extracts against *Nosema ceranae* spores. All fungal isolates used in the experiment were mostly only expressed with numbers for convenience

| No. of isolate | Inhibition rate (%) | Standard error | No. of isolate | Inhibition rate (%) | Standard error | No. of isolate | Inhibition rate (%) | Standard error | No. of isolate | Inhibition rate (%) | Standard error |
|----------------|---------------------|----------------|----------------|---------------------|----------------|----------------|---------------------|----------------|----------------|---------------------|----------------|
| <b>Control</b> | 0.00                | 1.24           | <b>290</b>     | 77.84               | 4.85           | <b>104</b>     | 64.47               | 13.91          | <b>194</b>     | 21.49               | 2.95           |
| <b>296</b>     | 96.45               | 2.81           | <b>25</b>      | 77.73               | 3.03           | <b>146</b>     | 64.16               | 4.47           | <b>186</b>     | 21.05               | 5.59           |
| <b>329</b>     | 96.10               | 3.73           | <b>357</b>     | 77.68               | 2.92           | <b>217</b>     | 63.41               | 5.43           | <b>190</b>     | 20.07               | 2.74           |
| <b>293</b>     | 94.42               | 2.36           | <b>361</b>     | 77.56               | 3.93           | <b>42</b>      | 63.20               | 1.11           | <b>160</b>     | 17.72               | 3.77           |
| <b>242</b>     | 94.00               | 3.39           | <b>272</b>     | 77.44               | 2.79           | <b>269</b>     | 62.36               | 4.55           | <b>78</b>      | 17.67               | 3.94           |
| <b>189</b>     | 93.66               | 5.88           | <b>16</b>      | 77.26               | 3.39           | <b>171</b>     | 62.18               | 2.74           | <b>63</b>      | 17.11               | 2.55           |
| <b>320</b>     | 93.66               | 2.92           | <b>246</b>     | 76.83               | 5.40           | <b>270</b>     | 62.05               | 8.07           | <b>86</b>      | 17.11               | 2.74           |
| <b>181</b>     | 93.61               | 2.27           | <b>258</b>     | 76.83               | 2.44           | <b>62</b>      | 61.62               | 3.20           | <b>83</b>      | 16.82               | 1.19           |
| <b>298</b>     | 93.41               | 2.01           | <b>263</b>     | 76.83               | 1.94           | <b>20</b>      | 61.51               | 1.71           | <b>158</b>     | 16.67               | 5.15           |
| <b>306</b>     | 93.19               | 5.84           | <b>303</b>     | 76.77               | 3.82           | <b>224</b>     | 60.98               | 1.54           | <b>214</b>     | 16.10               | 1.58           |
| <b>300</b>     | 93.08               | 2.59           | <b>338</b>     | 76.60               | 3.99           | <b>110</b>     | 60.69               | 3.86           | <b>3</b>       | 15.53               | 4.40           |
| <b>115</b>     | 92.47               | 3.93           | <b>363</b>     | 76.59               | 3.77           | <b>85</b>      | 60.53               | 2.88           | <b>75</b>      | 15.53               | 2.50           |
| <b>317</b>     | 91.22               | 2.12           | <b>247</b>     | 76.51               | 2.00           | <b>312</b>     | 60.15               | 2.35           | <b>192</b>     | 15.41               | 3.93           |
| <b>347</b>     | 90.98               | 5.48           | <b>105</b>     | 76.38               | 0.98           | <b>173</b>     | 59.87               | 3.14           | <b>33</b>      | 15.38               | 3.33           |
| <b>135</b>     | 90.94               | 1.95           | <b>8</b>       | 76.29               | 3.82           | <b>336</b>     | 59.67               | 5.20           | <b>46</b>      | 13.16               | 2.27           |
| <b>79</b>      | 90.76               | 5.48           | <b>349</b>     | 76.26               | 2.44           | <b>103</b>     | 58.60               | 4.62           | <b>205</b>     | 12.37               | 3.93           |
| <b>206</b>     | 90.60               | 6.78           | <b>210</b>     | 75.88               | 3.33           | <b>234</b>     | 58.60               | 2.61           | <b>84</b>      | 11.89               | 3.33           |
| <b>144</b>     | 90.48               | 2.18           | <b>52</b>      | 75.83               | 1.69           | <b>241</b>     | 58.54               | 5.20           | <b>56</b>      | 11.48               | 7.63           |
| <b>341</b>     | 90.43               | 3.61           | <b>65</b>      | 75.76               | 2.79           | <b>308</b>     | 57.51               | 3.32           | <b>139</b>     | 11.18               | 1.57           |
| <b>67</b>      | 90.15               | 2.36           | <b>209</b>     | 75.74               | 2.44           | <b>9</b>       | 56.75               | 2.76           | <b>93</b>      | 9.77                | 2.59           |
| <b>188</b>     | 90.15               | 1.11           | <b>275</b>     | 75.73               | 1.94           | <b>199</b>     | 56.62               | 4.28           | <b>31</b>      | 9.21                | 2.00           |
| <b>243</b>     | 89.91               | 7.87           | <b>222</b>     | 75.61               | 3.60           | <b>257</b>     | 56.59               | 4.92           | <b>53</b>      | 9.18                | 8.97           |
| <b>208</b>     | 89.67               | 13.18          | <b>254</b>     | 75.61               | 7.08           | <b>203</b>     | 56.58               | 4.47           | <b>32</b>      | 7.63                | 3.93           |
| <b>265</b>     | 89.64               | 8.29           | <b>342</b>     | 75.54               | 8.36           | <b>351</b>     | 56.30               | 2.21           | <b>43</b>      | 7.60                | 3.61           |
| <b>117</b>     | 89.57               | 6.10           | <b>19</b>      | 75.47               | 0.63           | <b>266</b>     | 56.10               | 6.69           | <b>128</b>     | 6.64                | 3.93           |
| <b>220</b>     | 89.49               | 1.58           | <b>76</b>      | 75.46               | 4.99           | <b>297</b>     | 56.10               | 3.18           | <b>187</b>     | 1.67                | 2.86           |
| <b>253</b>     | 89.40               | 2.93           | <b>4</b>       | 75.21               | 9.32           | <b>226</b>     | 55.12               | 4.94           | <b>45</b>      | 0.00                | 3.50           |
| <b>60</b>      | 89.29               | 3.72           | <b>331</b>     | 75.16               | 5.17           | <b>267</b>     | 55.12               | 3.43           | <b>14</b>      | 0.00                | 2.88           |
| <b>309</b>     | 89.27               | 2.34           | <b>288</b>     | 75.12               | 3.74           | <b>126</b>     | 54.87               | 6.07           | <b>6</b>       | 0.00                | 3.33           |
| <b>294</b>     | 89.10               | 2.68           | <b>311</b>     | 75.12               | 3.14           | <b>182</b>     | 54.74               | 2.93           | <b>18</b>      | 0.00                | 3.20           |
| <b>287</b>     | 89.02               | 4.09           | <b>245</b>     | 75.06               | 6.18           | <b>148</b>     | 54.64               | 4.03           | <b>22</b>      | 0.00                | 5.66           |

|     |       |       |     |       |       |     |       |      |     |      |      |
|-----|-------|-------|-----|-------|-------|-----|-------|------|-----|------|------|
| 161 | 88.66 | 2.86  | 40  | 75.01 | 2.18  | 323 | 54.63 | 4.12 | 259 | 0.00 | 6.35 |
| 289 | 88.44 | 3.65  | 195 | 74.91 | 3.50  | 134 | 54.34 | 7.09 | 154 | 0.00 | 1.42 |
| 95  | 88.39 | 2.56  | 360 | 74.63 | 5.46  | 70  | 53.76 | 3.45 | 37  | 0.00 | 1.51 |
| 276 | 88.29 | 4.78  | 2   | 74.31 | 8.52  | 316 | 53.66 | 7.39 | 34  | 0.00 | 5.15 |
| 249 | 88.20 | 10.95 | 41  | 74.08 | 4.87  | 324 | 53.31 | 7.50 | 71  | 0.00 | 8.92 |
| 64  | 88.10 | 1.66  | 57  | 74.07 | 3.83  | 168 | 53.15 | 5.07 | 28  | 0.00 | 3.39 |
| 354 | 87.36 | 4.72  | 344 | 74.04 | 3.89  | 221 | 52.44 | 2.79 | 54  | 0.00 | 4.40 |
| 340 | 87.15 | 2.73  | 211 | 73.80 | 2.65  | 228 | 52.20 | 4.77 | 138 | 0.00 | 4.43 |
| 348 | 86.64 | 3.67  | 172 | 73.78 | 4.62  | 299 | 52.20 | 6.64 | 13  | 0.00 | 4.91 |
| 26  | 86.62 | 2.86  | 327 | 73.69 | 7.67  | 278 | 51.30 | 3.51 |     |      |      |
| 165 | 86.43 | 1.24  | 271 | 73.66 | 4.06  | 136 | 51.15 | 2.37 |     |      |      |
| 96  | 86.37 | 10.47 | 280 | 73.66 | 2.68  | 202 | 51.08 | 5.30 |     |      |      |
| 367 | 86.30 | 3.11  | 193 | 73.57 | 2.39  | 23  | 50.65 | 5.59 |     |      |      |
| 121 | 85.91 | 5.93  | 29  | 73.56 | 6.07  | 49  | 50.00 | 4.50 |     |      |      |
| 17  | 85.85 | 2.51  | 30  | 73.44 | 3.42  | 157 | 49.82 | 5.63 |     |      |      |
| 204 | 85.84 | 1.75  | 215 | 73.42 | 2.34  | 98  | 49.74 | 1.85 |     |      |      |
| 59  | 85.83 | 3.14  | 125 | 73.23 | 1.75  | 237 | 48.58 | 2.92 |     |      |      |
| 97  | 85.39 | 3.50  | 365 | 72.93 | 1.85  | 91  | 46.68 | 3.73 |     |      |      |
| 235 | 85.39 | 4.17  | 7   | 72.71 | 1.55  | 80  | 46.29 | 2.90 |     |      |      |
| 330 | 85.37 | 2.43  | 286 | 72.56 | 6.98  | 102 | 46.28 | 4.15 |     |      |      |
| 333 | 85.37 | 3.02  | 302 | 72.56 | 3.93  | 155 | 45.85 | 4.12 |     |      |      |
| 339 | 85.37 | 4.55  | 368 | 72.52 | 3.93  | 310 | 45.84 | 2.72 |     |      |      |
| 51  | 85.21 | 3.27  | 39  | 72.50 | 3.33  | 283 | 45.64 | 4.28 |     |      |      |
| 164 | 85.19 | 4.75  | 5   | 72.40 | 5.86  | 120 | 45.49 | 2.05 |     |      |      |
| 1   | 84.88 | 0.31  | 201 | 72.22 | 4.40  | 264 | 45.42 | 6.06 |     |      |      |
| 183 | 84.67 | 4.91  | 177 | 72.01 | 6.62  | 282 | 45.12 | 5.37 |     |      |      |
| 145 | 84.63 | 7.80  | 143 | 71.54 | 4.75  | 366 | 44.80 | 2.64 |     |      |      |
| 27  | 84.26 | 1.16  | 163 | 71.32 | 11.06 | 151 | 44.74 | 3.72 |     |      |      |
| 321 | 84.21 | 3.82  | 77  | 71.25 | 2.56  | 315 | 44.39 | 2.14 |     |      |      |
| 364 | 84.15 | 5.17  | 47  | 71.03 | 3.93  | 129 | 44.08 | 4.12 |     |      |      |
| 261 | 84.13 | 2.61  | 174 | 70.92 | 6.07  | 127 | 44.05 | 3.30 |     |      |      |
| 218 | 83.90 | 4.12  | 350 | 70.89 | 1.17  | 101 | 43.95 | 3.93 |     |      |      |
| 279 | 83.90 | 4.08  | 233 | 70.89 | 3.51  | 175 | 43.82 | 6.19 |     |      |      |
| 307 | 83.87 | 1.73  | 346 | 70.77 | 3.32  | 213 | 43.42 | 3.14 |     |      |      |
| 90  | 83.85 | 3.93  | 281 | 70.73 | 4.36  | 335 | 42.92 | 3.43 |     |      |      |
| 137 | 83.48 | 3.83  | 326 | 70.73 | 8.77  | 232 | 41.46 | 6.06 |     |      |      |

|     |       |      |     |       |      |     |       |      |  |  |  |
|-----|-------|------|-----|-------|------|-----|-------|------|--|--|--|
| 58  | 83.40 | 4.33 | 69  | 70.49 | 5.76 | 313 | 41.45 | 4.41 |  |  |  |
| 61  | 82.98 | 2.96 | 334 | 70.49 | 5.95 | 106 | 40.82 | 5.69 |  |  |  |
| 358 | 82.95 | 6.21 | 132 | 70.22 | 8.22 | 304 | 40.79 | 4.30 |  |  |  |
| 227 | 82.86 | 3.44 | 114 | 70.20 | 3.11 | 359 | 40.49 | 1.92 |  |  |  |
| 328 | 82.68 | 3.00 | 229 | 69.80 | 3.02 | 89  | 40.47 | 2.27 |  |  |  |
| 99  | 82.64 | 3.20 | 24  | 69.75 | 5.98 | 162 | 40.26 | 4.99 |  |  |  |
| 72  | 82.64 | 5.76 | 322 | 69.69 | 2.62 | 292 | 39.65 | 5.39 |  |  |  |
| 184 | 82.39 | 6.00 | 352 | 69.27 | 3.57 | 179 | 39.21 | 3.93 |  |  |  |
| 10  | 82.26 | 1.08 | 268 | 69.07 | 4.55 | 325 | 38.70 | 3.22 |  |  |  |
| 274 | 82.23 | 1.92 | 197 | 69.05 | 5.11 | 362 | 38.43 | 3.77 |  |  |  |
| 150 | 82.14 | 4.46 | 152 | 69.05 | 3.39 | 225 | 36.36 | 8.61 |  |  |  |
| 239 | 81.94 | 2.86 | 170 | 69.04 | 2.77 | 207 | 35.66 | 3.35 |  |  |  |
| 35  | 81.83 | 5.59 | 68  | 68.67 | 7.31 | 131 | 35.49 | 3.83 |  |  |  |
| 337 | 81.61 | 8.08 | 74  | 68.53 | 4.40 | 180 | 35.26 | 3.11 |  |  |  |
| 238 | 80.98 | 3.11 | 262 | 68.29 | 4.15 | 305 | 34.34 | 1.97 |  |  |  |
| 284 | 80.98 | 2.55 | 250 | 68.29 | 3.25 | 140 | 34.21 | 1.95 |  |  |  |
| 295 | 80.76 | 4.12 | 153 | 68.19 | 2.68 | 50  | 33.88 | 3.33 |  |  |  |
| 332 | 80.64 | 6.75 | 113 | 67.59 | 1.78 | 159 | 33.88 | 3.93 |  |  |  |
| 185 | 80.58 | 1.25 | 353 | 67.07 | 4.66 | 156 | 33.33 | 7.80 |  |  |  |
| 255 | 80.49 | 4.72 | 198 | 66.75 | 4.91 | 88  | 32.65 | 6.00 |  |  |  |
| 252 | 80.42 | 9.18 | 133 | 66.62 | 2.51 | 231 | 32.21 | 3.11 |  |  |  |
| 230 | 80.15 | 2.86 | 285 | 66.54 | 5.17 | 119 | 32.02 | 4.15 |  |  |  |
| 100 | 80.09 | 6.44 | 244 | 66.50 | 5.24 | 87  | 30.64 | 3.83 |  |  |  |
| 240 | 79.97 | 3.59 | 48  | 66.33 | 7.12 | 223 | 29.52 | 5.20 |  |  |  |
| 318 | 79.74 | 5.46 | 355 | 66.18 | 2.62 | 38  | 28.95 | 3.33 |  |  |  |
| 291 | 79.30 | 3.87 | 251 | 65.75 | 2.28 | 66  | 27.33 | 4.15 |  |  |  |
| 149 | 79.11 | 8.14 | 169 | 65.72 | 5.17 | 277 | 26.83 | 3.57 |  |  |  |
| 107 | 78.67 | 5.48 | 314 | 65.61 | 4.71 | 236 | 25.37 | 2.93 |  |  |  |
| 130 | 78.60 | 5.25 | 142 | 65.58 | 3.93 | 73  | 25.36 | 1.08 |  |  |  |
| 219 | 78.47 | 2.59 | 12  | 65.26 | 4.99 | 196 | 24.89 | 3.33 |  |  |  |
| 124 | 78.46 | 3.33 | 92  | 64.98 | 3.20 | 167 | 24.21 | 2.27 |  |  |  |
| 216 | 78.16 | 1.16 | 273 | 64.88 | 2.94 | 112 | 23.68 | 5.55 |  |  |  |
| 301 | 78.05 | 2.20 | 15  | 64.73 | 2.88 | 345 | 23.63 | 3.37 |  |  |  |
| 343 | 78.05 | 7.04 | 356 | 64.63 | 2.62 | 123 | 23.03 | 6.00 |  |  |  |

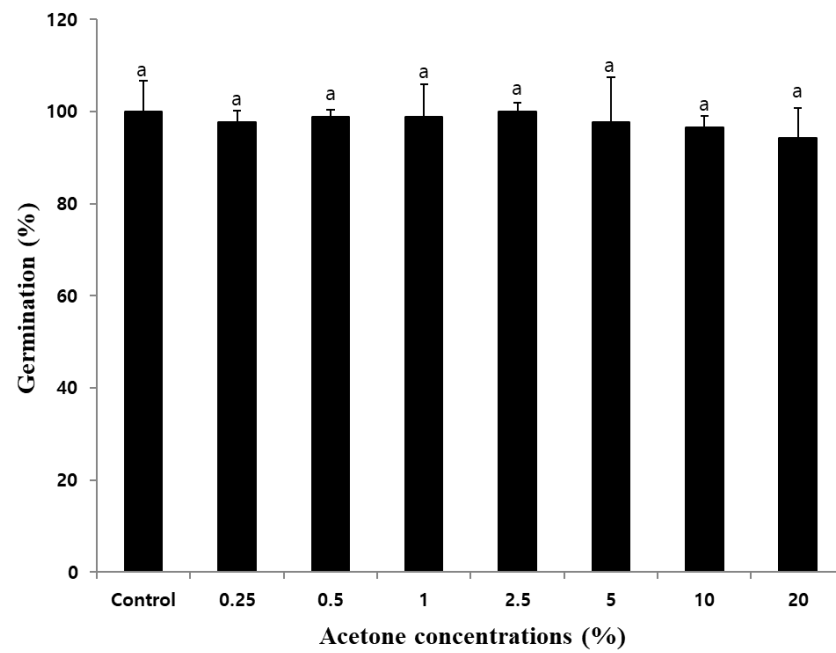

**Figure S1.** Viability of *Nosema ceranae* spores by acetone treatment at different concentrations. After treating the spores with acetone at each concentration, the germination rate was determined by an *in vitro* germination assay. Values with different letters are significantly different ( $p < 0.05$ , SNK test in one-way ANOVA).

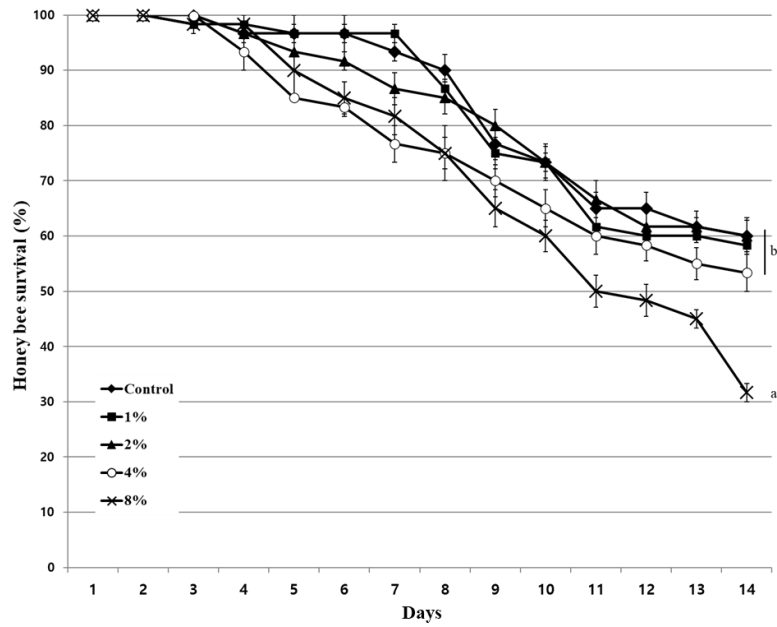

**Figure S2.** Honey bee survival by acetone treatment at different concentrations. A mixture of acetone and 50% sucrose solution was fed to honey bees. After that, the survival rate of honey bees was determined for 14 days. The control group was fed only a 50% sucrose solution. Data show the mean  $\pm$  SE. Values with different letters are significantly different ( $p < 0.05$ , SNK test in one-way ANOVA) at 14 days.
